# Supplementary material for: The sodium channel β1 subunit mediates outgrowth of neurite-like processes on breast cancer cells and promotes tumour growth and metastasis
Source: PubMed Central journal article supplement (PMC4200311; doi:10.1002/ijc.28890), 2014-04-12
Supplement: NIHMS60666-supplement-Supplementary_Table_1.pdf [file NIHMS60666-supplement-Supplementary_Table_1.pdf]

**Table S1.** Primer sequences.

| Gene                                       | Forward primer 5'-3'           | Reverse primer 5'-3'           | Reference    |
|--------------------------------------------|--------------------------------|--------------------------------|--------------|
| <i>ACTB</i>                                | AGCCTCGCCTTTGCCGA              | CTGGTGCCTGGGGCG                | <sup>1</sup> |
| <i>FYN</i>                                 | GCAGGATGCTGATCTAAACG           | TCCTTACATTGCACACAGCC           | -            |
| <i>GAPDH</i>                               | AAGGTGAAGGTCGGAGTCA<br>AC      | CCAGAGTTAAAAGCAGCCCTG          | <sup>2</sup> |
| <i>GREB1</i>                               | CAAAGAATAACCTGTTGGCC<br>CTGC   | GACATGCCTGCGCTCTCATACT<br>TA   | <sup>3</sup> |
| <i>SCN1B</i> -<br>β1 splice<br>variant     | GTCGTCAAGAAGATCCACAT<br>TGAGGT | TTCGGCCACCTGGACGCCCGTG<br>CAG  | <sup>4</sup> |
| <i>SCN1B</i> -<br>β1B<br>splice<br>variant | GTCGTCAAGAAGATCCACAT<br>TGAGGT | AACCACACCCCGAGAAACACA<br>TCGGA | <sup>4</sup> |

## References

- 1 Kreuzer, K. A. *et al.* Highly sensitive and specific fluorescence reverse transcription-PCR assay for the pseudogene-free detection of beta-actin transcripts as quantitative reference. *Clin Chem* **45**, 297-300 (1999).
- 2 Swift, S. L., Burns, J. E. & Maitland, N. J. Altered expression of neurotensin receptors is associated with the. *Cancer Res* **70**, 347-356, doi:10.1158/0008-5472.can-09-1252 (2010).
- 3 Rae, J. M. *et al.* GREB 1 is a critical regulator of hormone dependent breast cancer growth. *Breast Cancer Res Treat* **92**, 141-149, doi:10.1007/s10549-005-1483-4 (2005).
- 4 Patino, G. A. *et al.* Voltage-gated Na<sup>+</sup> channel β1B: a secreted cell adhesion molecule involved in human epilepsy. *J Neurosci* **31**, 14577-14591 (2011).
