# Supplementary material for: The sodium channel β1 subunit mediates outgrowth of neurite-like processes on breast cancer cells and promotes tumour growth and metastasis
Source: PubMed Central journal article supplement (PMC4200311; doi:10.1002/ijc.28890), 2014-04-12
Supplement: NIHMS60666-supplement-Supplementary_Table_2.pdf [file NIHMS60666-supplement-Supplementary_Table_2.pdf]

**Table S2.** Correlation between *SCN1B* expression and histoclinical characteristics

| Oncomine breast dataset | <i>SCN1B</i> level | Age  |     | Pathological tumour size |    |    | Grade |    |    | Recurrence within 5 years |    | ER    |    | PR   |    | HER2 |    |
|-------------------------|--------------------|------|-----|--------------------------|----|----|-------|----|----|---------------------------|----|-------|----|------|----|------|----|
|                         |                    | ≤50  | >50 | T1                       | T2 | T3 | 1     | 2  | 3  | -                         | +  | -     | +  | -    | +  | -    | +  |
| Bittner                 | Low                | 52   | 115 | 44                       | 84 | 13 | 12    | 56 | 70 |                           |    | 37    | 69 | 53   | 53 | 69   | 29 |
|                         | High               | 46   | 122 | 40                       | 75 | 25 | 18    | 51 | 71 |                           |    | 41    | 85 | 55   | 69 | 83   | 31 |
|                         | P                  | 0.47 |     | 0.11                     |    |    | 0.49  |    |    |                           |    | 0.78  |    | 0.43 |    | 0.76 |    |
| Boersma                 | Low                | 9    | 15  |                          |    |    |       |    |    |                           |    | 15    | 8  |      |    | 18   | 3  |
|                         | High               | 9    | 25  |                          |    |    |       |    |    |                           |    | 11    | 13 |      |    | 20   | 2  |
|                         | P                  | 0.40 |     |                          |    |    |       |    |    |                           |    | 0.24  |    |      |    | 0.66 |    |
| Chin                    | Low                | 26   | 33  | 21                       | 34 | 4  |       |    |    |                           |    | 27    | 32 | 27   | 31 | 33   | 4  |
|                         | High               | 28   | 30  | 26                       | 28 | 5  |       |    |    |                           |    | 16    | 43 | 14   | 34 | 38   | 4  |
|                         | P                  | 0.71 |     | 0.54                     |    |    |       |    |    |                           |    | 0.06  |    | 0.08 |    | 0.99 |    |
| Desmedt                 | Low                | 78   | 28  | 41                       | 65 | 0  | 14    | 42 | 48 | 74                        | 28 | 42    | 65 |      |    |      |    |
|                         | High               | 64   | 28  | 27                       | 65 | 0  | 16    | 41 | 35 | 60                        | 28 | 22    | 70 |      |    |      |    |
|                         | P                  | 0.64 |     | 0.18                     |    |    | 0.48  |    |    | 0.53                      |    | <0.05 |    |      |    |      |    |
| Farmer                  | Low                |      |     |                          |    |    |       |    |    |                           |    | 12    | 10 |      |    |      |    |

|           |      |      |    |      |    |    |      |    |    |      |   |       |    |       |    |      |    |
|-----------|------|------|----|------|----|----|------|----|----|------|---|-------|----|-------|----|------|----|
|           | High |      |    |      |    |    |      |    |    |      |   | 6     | 15 |       |    |      |    |
|           | P    |      |    |      |    |    |      |    |    |      |   | 0.12  |    |       |    |      |    |
| Finak     | Low  | 10   | 17 | 15   | 12 | 0  | 2    | 11 | 14 | 5    | 5 | 6     | 21 | 14    | 13 | 21   | 6  |
|           | High | 11   | 15 | 16   | 9  | 1  | 1    | 12 | 13 | 3    | 6 | 4     | 22 | 12    | 14 | 22   | 4  |
|           | P    | 0.78 |    | 0.49 |    |    | 0.82 |    |    | 0.65 |   | 0.73  |    | 0.79  |    | 0.73 |    |
| Ginestier | Low  | 7    | 20 | 9    | 16 | 3  | 2    | 3  | 23 |      |   | 19    | 9  | 22    | 6  |      |    |
|           | High | 9    | 18 | 10   | 14 | 3  | 2    | 9  | 16 |      |   | 9     | 18 | 12    | 15 |      |    |
|           | P    | 0.77 |    | 0.92 |    |    | 0.12 |    |    |      |   | <0.05 |    | <0.05 |    |      |    |
| Gluck     | Low  |      |    | 1    | 41 | 34 | 8    | 25 | 37 |      |   | 39    | 36 | 51    | 24 | 56   | 20 |
|           | High |      |    | 1    | 30 | 45 | 11   | 24 | 32 |      |   | 31    | 45 | 46    | 30 | 63   | 13 |
|           | P    |      |    | 0.20 |    |    | 0.67 |    |    |      |   | 0.19  |    | 0.40  |    | 0.24 |    |
| Hess      | Low  | 27   | 40 | 8    | 35 | 24 | 1    | 23 | 43 | 3    | 7 | 34    | 33 | 43    | 22 | 48   | 18 |
|           | High | 35   | 31 | 5    | 35 | 26 | 1    | 31 | 34 | 3    | 5 | 17    | 49 | 32    | 33 | 51   | 15 |
|           | P    | 0.17 |    | 0.68 |    |    | 0.33 |    |    | 0.71 |   | <0.01 |    | 0.08  |    | 0.69 |    |
| Julka     | Low  |      |    | 0    | 2  | 20 | 0    | 10 | 2  |      |   | 9     | 12 | 10    | 11 | 12   | 9  |
|           | High |      |    | 0    | 3  | 19 | 1    | 12 | 2  |      |   | 12    | 10 | 13    | 9  | 12   | 10 |
|           | P    |      |    | 0.89 |    |    | 0.65 |    |    |      |   | 0.55  |    | 0.55  |    | 0.99 |    |

|          |      |      |    |      |    |   |         |    |    |      |    |    |         |    |      |       |      |
|----------|------|------|----|------|----|---|---------|----|----|------|----|----|---------|----|------|-------|------|
| Kreike   | Low  | 26   | 0  |      |    |   | 8       | 6  | 12 |      |    |    |         |    |      |       |      |
|          | High | 23   | 0  |      |    |   | 2       | 6  | 15 |      |    |    |         |    |      |       |      |
|          | P    | 0.99 |    |      |    |   | 0.15    |    |    |      |    |    |         |    |      |       |      |
| Loi      | Low  | 2    | 42 | 22   | 21 | 1 | 7       | 18 | 10 | 37   | 4  |    |         | 13 | 30   |       |      |
|          | High | 1    | 42 | 21   | 21 | 1 | 10      | 19 | 6  | 31   | 10 |    |         | 8  | 34   |       |      |
|          | P    | 0.99 |    | 0.99 |    |   | 0.46    |    |    | 0.14 |    |    |         |    |      | 0.32  |      |
| Loi 3    | Low  | 3    | 36 | 17   | 22 | 0 | 7       | 10 | 13 | 32   | 6  |    |         | 12 | 27   |       |      |
|          | High | 3    | 35 | 17   | 20 | 1 | 7       | 10 | 11 | 34   | 4  |    |         | 6  | 32   |       |      |
|          | P    | 0.99 |    | 0.58 |    |   | 0.95    |    |    | 0.74 |    |    |         |    |      | 0.18  |      |
| Lu       | Low  |      |    | 26   | 35 | 4 | 5       | 10 | 50 |      |    | 38 | 27      |    |      | 44    | 21   |
|          | High |      |    | 29   | 32 | 4 | 22      | 22 | 20 |      |    | 15 | 49      |    |      | 54    | 10   |
|          | P    |      |    | 0.86 |    |   | <0.0001 |    |    |      |    |    | <0.0001 |    |      | <0.05 |      |
| Ma 3     | Low  | 2    | 28 | 16   | 14 | 0 | 2       | 22 | 6  | 19   | 8  | 1  | 29      | 5  | 25   | 27    | 1    |
|          | High | 0    | 30 | 14   | 15 | 1 | 1       | 17 | 12 | 18   | 8  | 0  | 30      | 5  | 25   | 25    | 2    |
|          | P    | 0.49 |    | 0.56 |    |   | 0.23    |    |    | 0.99 |    |    | 0.99    |    | 0.99 |       | 0.61 |
| Nikolsky | Low  | 39   | 31 |      |    |   | 3       | 29 | 30 |      |    | 31 | 39      | 38 | 32   | 45    | 25   |
|          | High | 34   | 30 |      |    |   | 3       | 27 | 25 |      |    | 29 | 37      | 38 | 27   | 41    | 26   |

|                 |      |      |    |      |    |    |       |    |    |      |    |         |     |       |    |      |  |
|-----------------|------|------|----|------|----|----|-------|----|----|------|----|---------|-----|-------|----|------|--|
|                 | P    | 0.86 |    |      |    |    | 0.95  |    |    |      |    | 0.99    |     | 0.73  |    | 0.73 |  |
| Radvanyi        | Low  | 9    | 18 | 10   | 14 | 2  | 2     | 12 | 13 |      |    |         |     |       |    |      |  |
|                 | High | 4    | 20 | 7    | 11 | 2  | 5     | 6  | 9  |      |    |         |     |       |    |      |  |
|                 | P    | 0.21 |    | 0.95 |    |    | 0.219 |    |    |      |    |         |     |       |    |      |  |
| Richardson<br>2 | Low  |      |    |      |    |    |       |    |    |      | 14 | 5       | 15  | 4     | 15 | 3    |  |
|                 | High |      |    |      |    |    |       |    |    |      | 10 | 10      | 11  | 9     | 14 | 5    |  |
|                 | P    |      |    |      |    |    |       |    |    | 0.19 |    | 0.18    |     | 0.69  |    |      |  |
| Schmidt         | Low  |      |    |      |    |    | 17    | 64 | 19 |      |    |         |     |       |    |      |  |
|                 | High |      |    |      |    |    | 12    | 72 | 16 |      |    |         |     |       |    |      |  |
|                 | P    |      |    |      |    |    | 0.45  |    |    |      |    |         |     |       |    |      |  |
| TCGA            | Low  | 34   | 78 | 32   | 90 | 24 |       |    |    |      | 45 | 98      | 63  | 80    | 73 | 29   |  |
|                 | High | 30   | 62 | 30   | 85 | 26 |       |    |    |      | 15 | 122     | 34  | 102   | 81 | 22   |  |
|                 | P    | 0.76 |    | 0.90 |    |    |       |    |    |      |    | <0.0001 |     | <0.01 |    | 0.26 |  |
| vandeVijver     | Low  |      |    |      |    |    |       |    |    | 101  | 45 | 47      | 102 |       |    |      |  |
|                 | High |      |    |      |    |    |       |    |    | 95   | 46 | 22      | 124 |       |    |      |  |
|                 | P    |      |    |      |    |    |       |    |    | 0.80 |    | <0.001  |     |       |    |      |  |
| vantVeer        | Low  | 44   | 15 | 30   | 29 | 0  | 2     | 9  | 48 |      |    | 23      | 36  | 29    | 30 |      |  |

|               |      |      |    |      |    |   |       |    |    |      |    |       |    |      |    |      |   |
|---------------|------|------|----|------|----|---|-------|----|----|------|----|-------|----|------|----|------|---|
|               | High | 38   | 20 | 37   | 20 | 1 | 10    | 18 | 30 |      |    | 16    | 42 | 20   | 38 |      |   |
|               | P    | 0.32 |    | 0.18 |    |   | <0.01 |    |    |      |    | 0.24  |    | 0.13 |    |      |   |
| Waddell       | Low  |      |    |      |    |   |       |    |    |      |    | 14    | 19 | 16   | 14 | 19   | 6 |
|               | High |      |    |      |    |   |       |    |    |      |    | 13    | 23 | 12   | 24 | 24   | 6 |
|               | P    |      |    |      |    |   |       |    |    |      |    | 0.63  |    | 0.14 |    | 0.75 |   |
| Wang          | Low  |      |    |      |    |   |       |    | 84 | 52   | 41 | 102   |    |      |    |      |   |
|               | High |      |    |      |    |   |       |    | 96 | 41   | 36 | 107   |    |      |    |      |   |
|               | P    |      |    |      |    |   |       |    |    | 0.16 |    | 0.59  |    |      |    |      |   |
| West          | Low  |      |    |      |    |   |       |    |    |      | 17 | 8     |    |      |    |      |   |
|               | High |      |    |      |    |   |       |    |    |      | 7  | 17    |    |      |    |      |   |
|               | P    |      |    |      |    |   |       |    |    |      |    | <0.05 |    |      |    |      |   |
| Zhao          | Low  | 7    | 19 |      |    |   | 2     | 17 | 8  |      |    | 11    | 12 | 11   | 11 | 16   | 6 |
|               | High | 10   | 16 |      |    |   | 3     | 21 | 4  |      |    | 3     | 22 | 6    | 18 | 12   | 8 |
|               | P    | 0.56 |    |      |    |   | 0.38  |    |    |      |    | <0.05 |    | 0.13 |    | 0.52 |   |
| Study count   |      | 0    |    | 0    |    |   | 2     |    |    | 0    |    | 8     |    | 2    |    | 1    |   |
| Misses        |      | 16   |    | 15   |    |   | 15    |    |    | 8    |    | 13    |    | 14   |    | 13   |   |
| Total studies |      | 16   |    | 15   |    |   | 17    |    |    | 8    |    | 21    |    | 16   |    | 14   |   |

|         |      |      |      |      |         |      |      |
|---------|------|------|------|------|---------|------|------|
| % total | 0    | 0    | 11.7 | 0    | 38.1    | 12.5 | 7.1  |
| P       | 0.44 | 0.46 | 0.13 | 0.66 | <0.0001 | 0.15 | 0.36 |

Low vs. high *SCN1B* expression cut-off is at 50<sup>th</sup> percentile. Study count, the number of datasets in which histoclinical characteristic associates with *SCN1B* expression.

Misses, the number of datasets in which there was no association. % total, the % of datasets in which the histoclinical characteristic associates with *SCN1B* expression. P values within each dataset are from Fisher's exact tests except for pathological tumour size and grade, which are from  $\chi^2$  tests. P values for meta-analysis of association between *SCN1B* expression and individual histoclinical characteristics across multiple datasets, are from binomial tests.
